# Supplementary material for: Personal Health Records: A Systematic Literature Review
Source: PubMed Central journal article supplement (PMC5251169; doi:10.2196/jmir.5876), 2017-01-06

# Personal Health Records: A Systematic Literature Review

Alex Roehrs, MSc; Cristiano André da Costa, PhD;  
Rodrigo da Rosa Righi, PhD; Kleinner Silva Farias de Oliveira, PhD

Programa de Pós-Graduação em Computação Aplicada,  
Universidade do Vale do Rio dos Sinos, São Leopoldo, Brazil

DOI:10.2196/jmir.5876

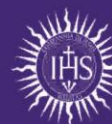

JESUÍTAS BRASIL

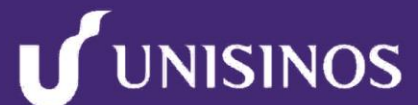

# Agenda

## Introduction

- PHR and EHR relationships

## Method

- Research Questions
- Search Strategy
- Article Selection
- Quality Assessment
- Data Extraction

## Results

- Proceeding with Article Selection
- Data Extraction and Answers to the Research Questions

## Discussion

- Limitations
- Conclusions

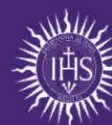

# Introduction

- Objective: explore the recent literature related to PHR defining the taxonomy, challenges and open questions
- Methods: using Systematic Literature Review (SLR)
- In addition, to identify:
  - Data types
  - Standards
  - Profiles
  - Goals
  - Methods
  - Functions
  - Architectures

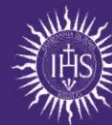

# PHR and EHR Relationships

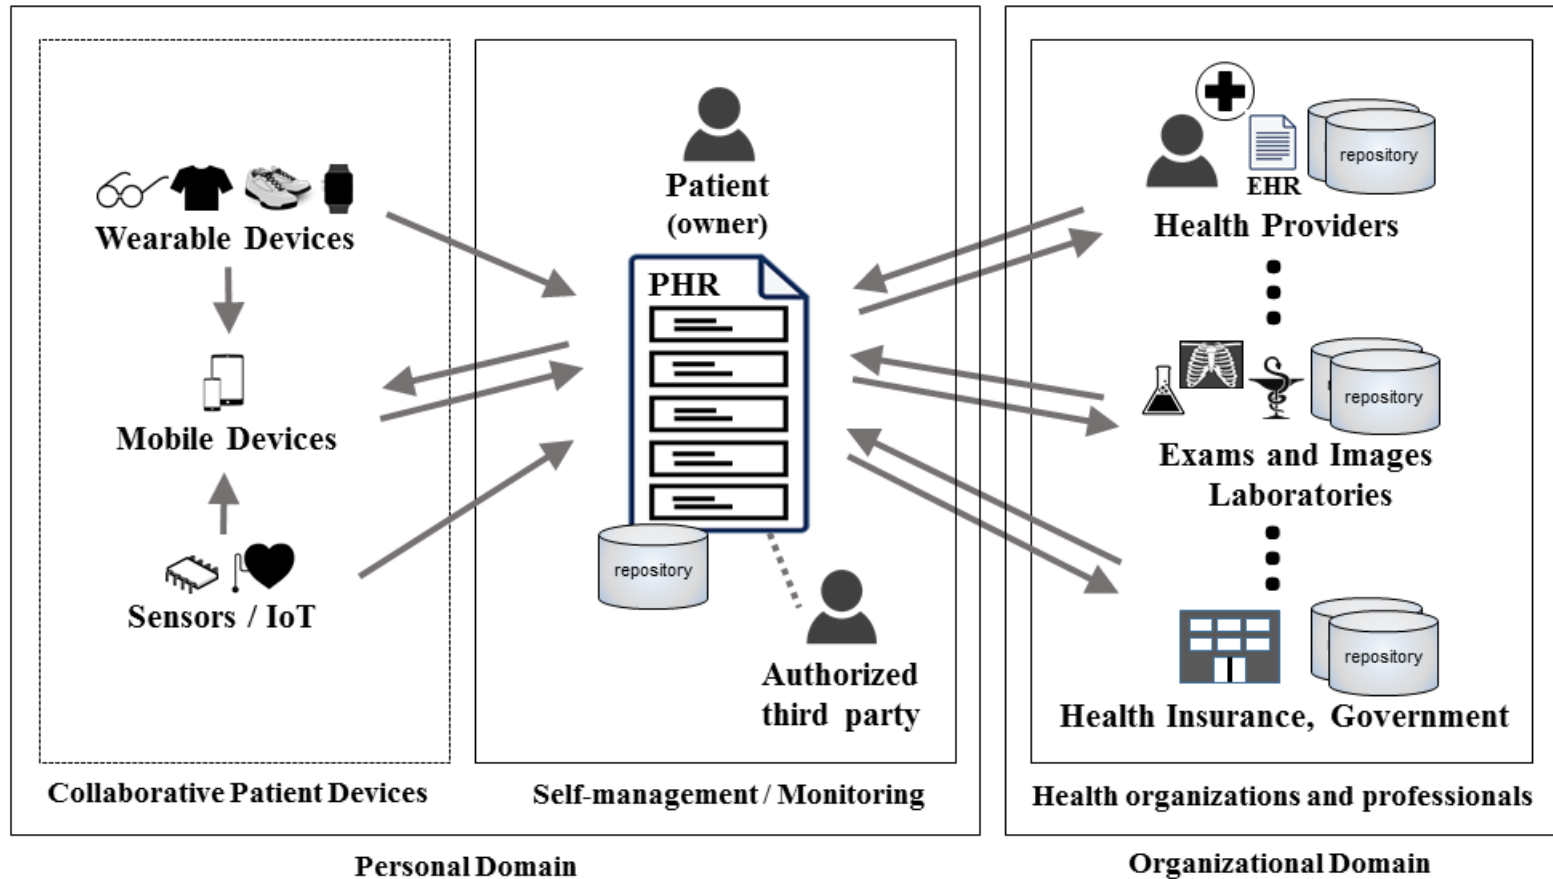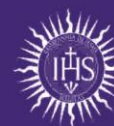

# Method

- I. Research Questions
- II. Search Strategy
- III. Article Selection
- IV. Quality Assessment
- V. Data Extraction

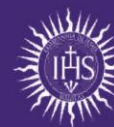

# Research Questions

---

| Group / ID                     | Issue                                                                     |
|--------------------------------|---------------------------------------------------------------------------|
| <b>General Questions (GQ)</b>  |                                                                           |
| GQ1                            | How would the taxonomy for PHR classification appear?                     |
| GQ2                            | What are the challenges and open questions related to PHRs?               |
| <b>Specific Questions (SQ)</b> |                                                                           |
| SQ1                            | What are the data types that are included in a PHR?                       |
| SQ2                            | What are the standards that apply to PHRs?                                |
| SQ3                            | What are the user types and profiles that interact with a PHR?            |
| SQ4                            | What are the interaction types of a patient with a PHR?                   |
| SQ5                            | Which are the techniques or methods used to input information into a PHR? |
| SQ6                            | What are the goals of a PHR?                                              |
| SQ7                            | What are the types or models of architectures of PHR?                     |

---



# Search Strategy

- **PICOC**
  - I. Population**
  - II. Intervention**
  - III. Comparison**
  - IV. Outcome**
  - V. Context**

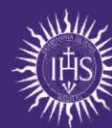

# Articles Selection

- Steps
  - I. Impurity Removal
  - II. Filter by Title and Abstract
  - III. Duplicate Removal
  - IV. Filter by Full Text





# Quality Assessment

| ID | Issue                                                                              |
|----|------------------------------------------------------------------------------------|
| C1 | Does the article clearly show the purpose of the research?                         |
| C2 | Does the article adequately describe the literature review, background or context? |
| C3 | Does the article present the related work with regard to the main contribution?    |
| C4 | Does the article have an architecture proposal or research methodology described?  |
| C5 | Does the article have research results?                                            |
| C6 | Does the article present a conclusion related to the research objectives?          |
| C7 | Does the article recommend future works, improvements or further studies?          |

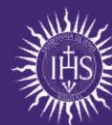

# Data Extraction

| Section                                    | Description                                                   | Research Questions      |
|--------------------------------------------|---------------------------------------------------------------|-------------------------|
| <b>Open content identification article</b> |                                                               |                         |
| Title                                      | Title of the scientific article.                              | GQ1, GQ2, SQ1, SQ2, SQ7 |
| Abstract                                   | Summary of paper's purpose, method and results.               | GQ1, GQ2, SQ1, SQ2, SQ7 |
| Keywords                                   | Words representing the text content.                          | GQ1, GQ2, SQ1, SQ2, SQ7 |
| <b>Article content</b>                     |                                                               |                         |
| Introduction                               | Introduction gated the issue to be addressed.                 | All questions.          |
| Background                                 | Section includes concepts and is related to the proposal.     | All questions.          |
| Method                                     | Presents and describes the scientific methodology.            | All questions.          |
| Results                                    | Performs an evaluation according to the proposed methodology. | All questions.          |
| Discussion                                 | Data that were quantified compared to the literature.         | GQ2, SQ2-SQ7            |
| Conclusion                                 | Findings related to the objectives and hypotheses.            | GQ2, SQ2-SQ7            |

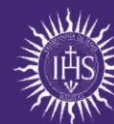

# Results

- We reviewed more than 5,000 scientific studies published in the last 10 years, selected the most significant approaches, and thoroughly surveyed the healthcare field related to PHRs.
- We obtained an updated taxonomy and identified challenges, open questions, and current data types, related standards, main profiles, input strategies, goals, functions and architectures of PHR.



# Proceeding with Article Selection

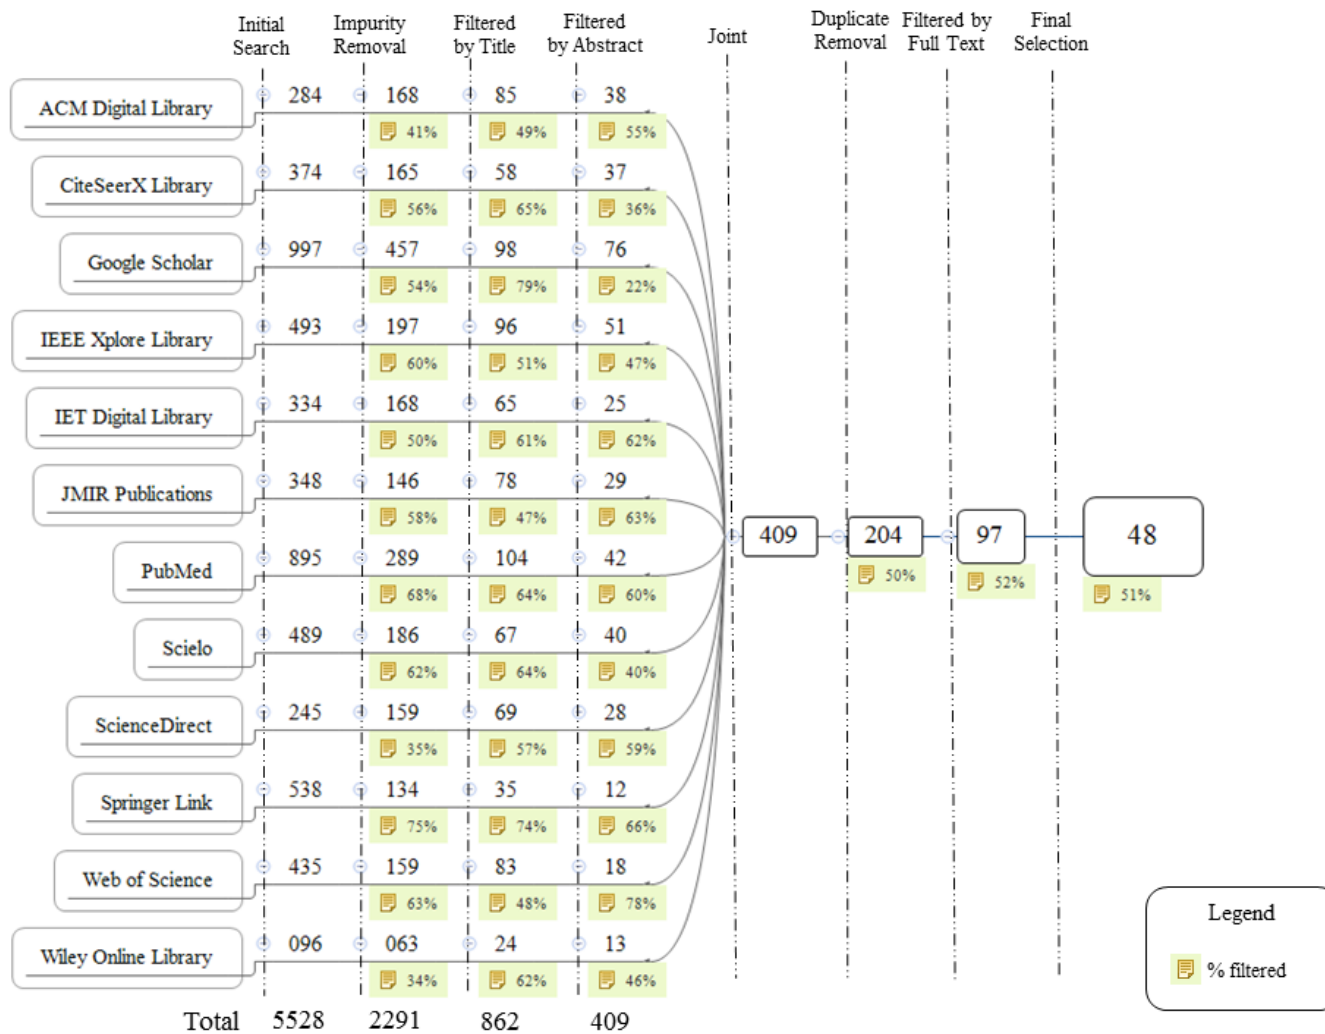

# Publication Chronology

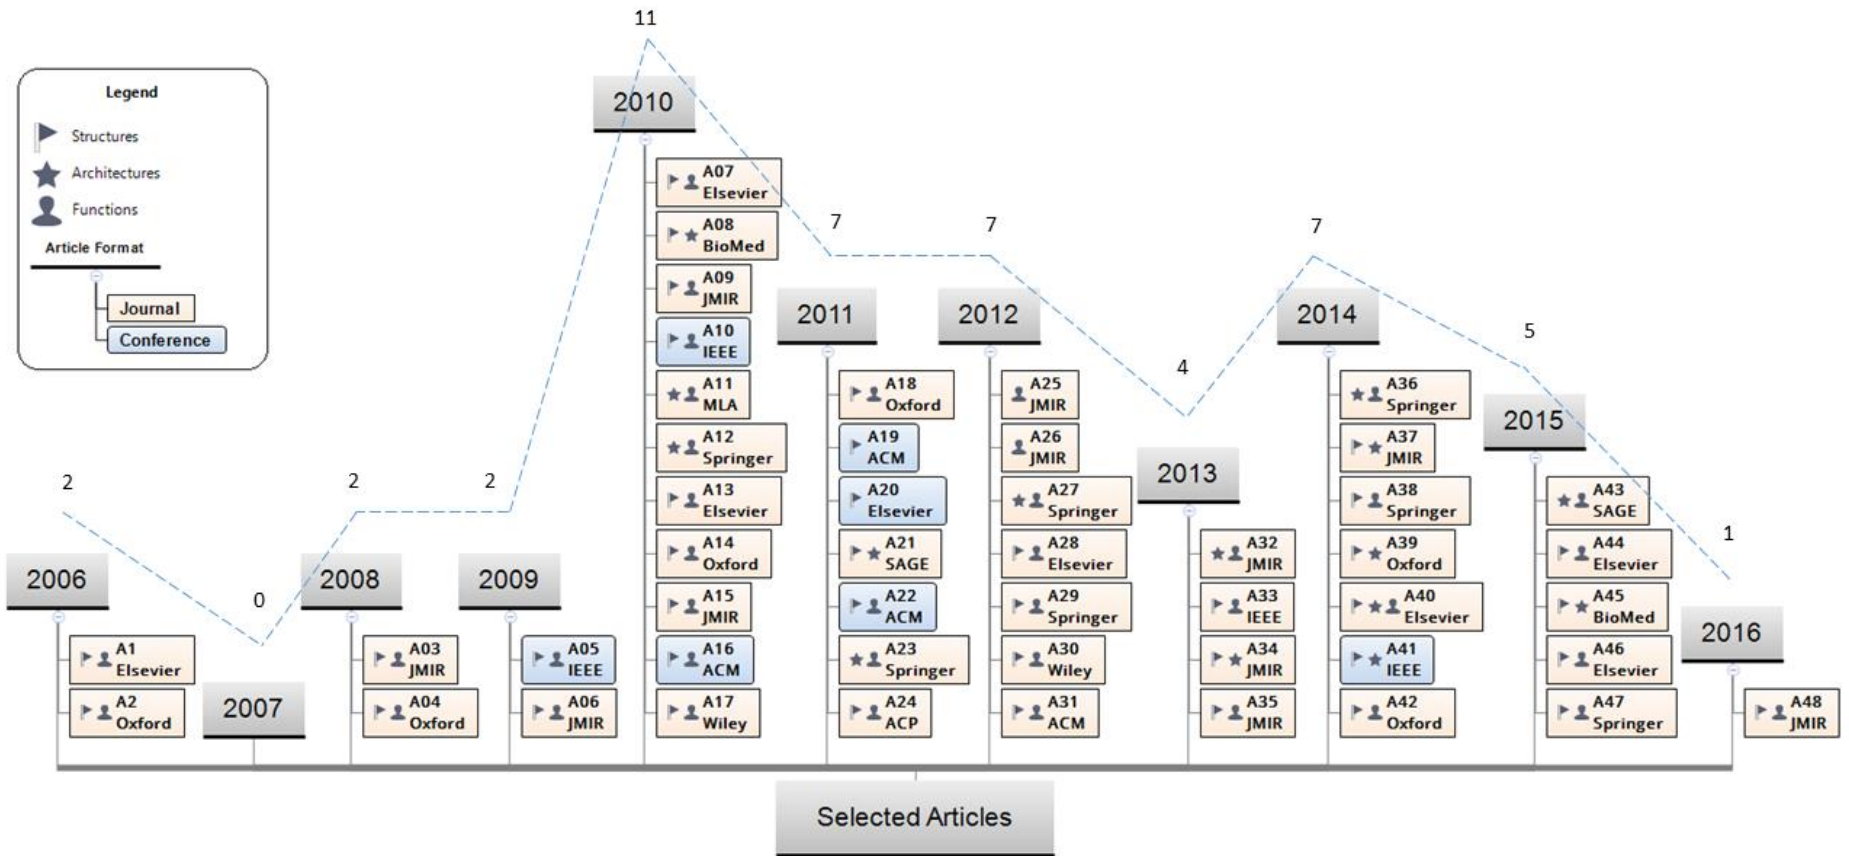

# PHR Taxonomy

| Group / Item            | Description                                                                             |
|-------------------------|-----------------------------------------------------------------------------------------|
| <b>1. Structures</b>    | Main data types and standards employed in health records.                               |
| 1.1. Data Types         | Data types found in PHRs (see subdivision and references in <b>SQ1</b> ).               |
| 1.2. Standards          | Standards to which PHRs can adhere (see subdivision and references in <b>SQ2</b> ).     |
| <b>2. Functions</b>     | Depicts the main goals and features present in the PHRs.                                |
| 2.1. Users/Profiles     | User types and profiles that interact (see subdivision and references in <b>SQ3</b> ).  |
| 2.2. Interaction        | Patient's interaction types with a PHR (see subdivision and references in <b>SQ4</b> ). |
| 2.3. Data Source        | Information techniques for input (see subdivision and references in <b>SQ5</b> ).       |
| 2.4. Goals              | Represents the aim of the PHR (see subdivision and references in <b>SQ6</b> ).          |
| <b>3. Architectures</b> | Architecture types and scopes (see subdivision and references in <b>SQ7</b> ).          |
| 3.1. Models             | Describes the main architectures models.                                                |
| 3.2. Coverage           | Has a physical location division for data.                                              |

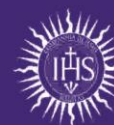

# Challenges and Open Questions

---

| Group/ID                                      | Challenge and Concern (CC)                       |
|-----------------------------------------------|--------------------------------------------------|
| <b>GCC1 - Collaboration and Communication</b> |                                                  |
| CC01                                          | Context-aware computing                          |
| CC02                                          | Wearable computing, IoT                          |
| CC03                                          | AI applied to health                             |
| CC04                                          | Personalization, usability, familiarity, comfort |
| CC05                                          | Manage medications                               |
| CC06                                          | Patient-generated data                           |
| <b>GCC2 - Privacy, Security and Trust</b>     |                                                  |
| CC07                                          | Confidentiality and integrity                    |
| CC08                                          | Data repository ownership                        |
| CC09                                          | Authorization and access control technologies    |
| CC10                                          | Secure transport protocol                        |
| <b>GCC3 - Infrastructure</b>                  |                                                  |
| CC11                                          | Portability – devices, equipment, HW             |
| CC12                                          | Efficiency and scalability                       |
| <b>GCC4 - Integration</b>                     |                                                  |
| CC13                                          | Patterns in collecting medical data              |
| CC14                                          | Terminology                                      |
| CC15                                          | Interoperability                                 |

---

# PHR Data Types

| Type            | Description                                            |
|-----------------|--------------------------------------------------------|
| Allergies       | Allergies and adverse reactions                        |
| Demographic     | Patient statistics and clinical data                   |
| Documents       | Attached files (photos, scanned docs)                  |
| Evolution       | Progress and clinic notes, care plan                   |
| Family history  | Family medical history                                 |
| General         | Patient registration information, emergency contact    |
| Genetic         | Genetic information                                    |
| Home monitor    | Home-monitored data                                    |
| Immunizations   | Immunization records (Vaccine), tracking immunizations |
| Insurance       | Insurance plan information, coding for billing         |
| Lab results     | Laboratory and imaging test results (laboratory tests) |
| Major illnesses | List of major diseases                                 |
| Medications     | Medication list prescribed, past medicines taken       |
| Prescriptions   | Medical prescription refills (renewing)                |
| Prevention      | Preventive health recommendations                      |
| Providers       | Previous healthcare provider list                      |
| Scheduling      | Appointments, past procedures, Hospitalizations        |
| Social history  | Social history, lifestyle (health habits)              |
| Summaries       | Admissions, permanencies and discharges                |
| Vital Signs     | Status of bodily functions                             |





# PHR Related Standards

| Group / Std.                                    | Description                                                                                            |
|-------------------------------------------------|--------------------------------------------------------------------------------------------------------|
| <b>GS1 - Nomenclature and Terminology</b>       |                                                                                                        |
| HNA / NIC                                       | Nursing activities and intervention classification.                                                    |
| ICDx                                            | International classification of diseases.                                                              |
| LOINC                                           | Logical observation identifier names and codes.                                                        |
| SNOMED-CT                                       | Terminology collection of medical terms.                                                               |
| UMLS                                            | Unified medical language system.                                                                       |
| <b>GS2 - Privacy</b>                            |                                                                                                        |
| HIPAA                                           | Health insurance portability and accountability act.                                                   |
| <b>GS3 - Structural and Semantic</b>            |                                                                                                        |
| ASC X12N                                        | Accredited Standards Committee X12-INS.                                                                |
| CCD                                             | Continuity of care document.                                                                           |
| CCR                                             | Continuity of care record.                                                                             |
| CDA                                             | Clinical document architecture.                                                                        |
| DICOM                                           | Digital imaging and communications in medicine.                                                        |
| EN 13606                                        | EHR standards in Europe.                                                                               |
| HL7 / FHIR / SMART                              | High Level 7 / FHIR (Fast Healthcare Interoperability Resources) / SMART (Substitutable Medical Apps). |
| ISO                                             | TR (Technical Report) 14292 (PHR)<br>ISO/IEEE 11073 Personal Health Data (PHD).                        |
| OpenEHR                                         | Open standards specification in e-health.                                                              |
| xDT                                             | German family of data exchange formats                                                                 |
| <b>GS4 - Templates and Technology Platforms</b> |                                                                                                        |
| OpenMRS                                         | Open Medical Record System                                                                             |
| OSCAR                                           | Open Source Clinical Application Resource.                                                             |



# PHR Profiles, Interaction Types and Goals

## Profiles

- *Physician/Doctor*
- *Nurse*
- *Administrative*
- *Patient / Consumer*
- *Relative*
- *Public / Anonymous*

## Interaction Types

- *Direct*
- *Indirect*
- *Outsourced*

## Goals

- *Consult*
- *Maintain*
- *Monitor*



# PHR Information Techniques

---

| Technique / Profiles (Actors)  | Description                                                                                                                                                             |
|--------------------------------|-------------------------------------------------------------------------------------------------------------------------------------------------------------------------|
| <b>Data Collaboration (T1)</b> |                                                                                                                                                                         |
| Health Professionals           | Collaboration between multiple healthcare professionals. Healthcare providers are the owners (paternalistic relationship).                                              |
| <b>Patient Reports (T2)</b>    |                                                                                                                                                                         |
| Patient                        | Patient reports data, e.g., listing drugs that are being used or menstrual period data.                                                                                 |
| <b>Adaptive Platforms (T3)</b> |                                                                                                                                                                         |
| Environment                    | Aggregate sources provisioning individualized personal eHealth services combined with context info, including monitoring sensors. Patient and providers share the fill. |
| <b>Anonymization (T4)</b>      |                                                                                                                                                                         |
| Anonymous                      | Anonymizing social network data.                                                                                                                                        |

---



# PHR Architectures

| Group / Item          | Description                                                       |
|-----------------------|-------------------------------------------------------------------|
| <b>AG1 - Models</b>   |                                                                   |
| On paper              | health records are kept on paper                                  |
| Inside                | PHR is kept in local repositories, inside provider, for example   |
| Outside               | PHR is distributed or shared between servers outside the provider |
| Hybrid                | PHR is distributed inside and outside of the provider             |
| <b>AG2 - Coverage</b> |                                                                   |
| Standalone            | data coverage is used only in the provider area                   |
| Local                 | area is at the city level                                         |
| Regional              | data are used in the state or province                            |
| National              | coverage encompasses the nation                                   |
| International         | coverage transcends the nation                                    |



# Discussion

- Overview of the technology regarding PHR in the last ten years from a number of candidate articles.
- Identified several common aspects of studies by answering a number of research questions.
- Proposed a PHR taxonomy and identified gaps to be further researched that represent challenges and issues
- Identified data types, standardization, profiles and a classification of input techniques



# Limitations

- Review focused exclusively on articles addressing the inherent PHR concepts.
- Research sought to answer the resolution of the research questions
- Research was limited to obtaining articles published in a number of scientific portals related to ICT and health.
- Research was reduced to studies found from these websites when we implemented the steps of the SLR Methodology.
- Focused on scientific articles and did not address commercial or more technological approach solutions.



# Conclusions

- This study aimed to raise and discuss the main issues regarding PHR and identify the concepts of the technology in this area.
- To answer the research questions throughout this work, we sought first to systematize and qualify the information that served as a source for the survey.
- For the completion of the work, we were able to identify and propose a broad taxonomy for the scope of work, which was created after an analysis of the relevant articles in last decade.
- All of these results contribute to the achievement of a significant coverage degree regarding the technology related to PHRs.



Supplement: jmir_v19i1e13_app4.pdf [file jmir_v19i1e13_app4.pdf]
