# Supplementary material for: Personal Health Records: A Systematic Literature Review
Source: PubMed Central journal article supplement (PMC5251169; doi:10.2196/jmir.5876), 2017-01-06
Supplement: jmir_v19i1e13_app1.pdf [file jmir_v19i1e13_app1.pdf]

---

| Acronym        | Portal Name                                                                      |
|----------------|----------------------------------------------------------------------------------|
| ACM            | ACM Digital Library                                                              |
| CiteSeerX      | CiteSeerX Library                                                                |
| Google Scholar | Google Scholar                                                                   |
| IEEE           | IEEE Xplore Digital Library                                                      |
| IET            | IET Digital Library                                                              |
| JMIR           | JMIR Publications Library                                                        |
| PubMed         | National Center for Biotechnology Information, U.S. National Library of Medicine |
| SciELO         | Scientific Electronic Library Online                                             |
| ScienceDirect  | Elsevier B. V. ScienceDirect                                                     |
| Springer       | Springer Science                                                                 |
| Web of Science | Web of Science                                                                   |
| Wiley          | Wiley Online Library                                                             |

---
