# Supplementary material for: Personal Health Records: A Systematic Literature Review
Source: PubMed Central journal article supplement (PMC5251169; doi:10.2196/jmir.5876), 2017-01-06
Supplement: jmir_v19i1e13_app2.pdf [file jmir_v19i1e13_app2.pdf]

---

Publisher and Publications

---

**American College of Physicians**

- Annals of Internal Medicine

**Association for Computing Machinery**

- iConference
- International Conference on Software Engineering in Health Care
- Journal of Data and Information Quality

**BioMed Central**

- BMC Medical Informatics and Decision Making

**Elsevier**

- Applied Ergonomics
- Future Generation Computer Systems
- Health Policy and Technology
- International Journal of Medical Informatics
- Journal of Biomedical Informatics
- Web Semantics

**IEEE**

- Transactions on Information Technology in Biomedicine
- Transactions on Parallel and Distributed Systems
- International Conference on System Sciences
- International Conference on Pervasive Computing Technologies for Healthcare
- International Conference of the Engineering in Medicine and Biology

**JMIR Publications**

- Journal of Medical Internet Research

**Medical Library Association**

- Journal of the Medical Library Association

**SAGE Publications**

- Health Informatics Journal
- Human Factors

**Springer Science**

- Health and Technology
- Journal of General Internal Medicine
- Journal of Medical Systems
- Journal of Neuro-oncology

**The Oxford University Press**

- Journal of the American Medical Informatics Association

**Wiley Online Library**

- The Journal of Law, Medicine & Ethics
  - Journal of the American Society for Information Science and Technology
-
