# Supplementary material for: Personal Health Records: A Systematic Literature Review
Source: PubMed Central journal article supplement (PMC5251169; doi:10.2196/jmir.5876), 2017-01-06
Supplement: jmir_v19i1e13_app3.pdf [file jmir_v19i1e13_app3.pdf]

| User or profile and articles | Providers and health care professionals |       |                       | Laity               |                             | Public                  |
|------------------------------|-----------------------------------------|-------|-----------------------|---------------------|-----------------------------|-------------------------|
|                              | Physician, doctor                       | Nurse | Administrative, other | Patient or consumer | Relatives, caregiver, payer | Government, health plan |
| A01                          | ✓                                       | ✓     |                       | ✓                   | ✓                           | ✓                       |
| A02                          | ✓                                       |       |                       | ✓                   | ✓                           | ✓                       |
| A03                          | ✓                                       |       | ✓                     | ✓                   | ✓                           | ✓                       |
| A04                          | ✓                                       | ✓     | ✓                     | ✓                   | ✓                           | ✓                       |
| A05                          |                                         |       | ✓                     | ✓                   |                             | ✓                       |
| A06                          |                                         | ✓     | ✓                     | ✓                   |                             | ✓                       |
| A07                          | ✓                                       | ✓     |                       | ✓                   |                             | ✓                       |
| A08                          | ✓                                       | ✓     | ✓                     | ✓                   | ✓                           | ✓                       |
| A09                          | ✓                                       | ✓     |                       | ✓                   | ✓                           | ✓                       |
| A10                          | ✓                                       |       |                       |                     | ✓                           | ✓                       |
| A11                          |                                         |       |                       | ✓                   |                             | ✓                       |
| A12                          | ✓                                       |       |                       | ✓                   |                             | ✓                       |
| A13                          | ✓                                       |       |                       | ✓                   |                             | ✓                       |
| A14                          | ✓                                       |       |                       | ✓                   |                             | ✓                       |
| A15                          | ✓                                       | ✓     |                       | ✓                   |                             | ✓                       |
| A16                          | ✓                                       | ✓     | ✓                     | ✓                   | ✓                           | ✓                       |
| A17                          | ✓                                       |       | ✓                     | ✓                   | ✓                           | ✓                       |
| A18                          | ✓                                       | ✓     | ✓                     | ✓                   | ✓                           | ✓                       |
| A19                          | ✓                                       |       |                       | ✓                   | ✓                           | ✓                       |
| A20                          | ✓                                       | ✓     |                       | ✓                   | ✓                           | ✓                       |
| A21                          | ✓                                       | ✓     |                       | ✓                   | ✓                           | ✓                       |
| A22                          | ✓                                       | ✓     |                       | ✓                   | ✓                           | ✓                       |
| A23                          |                                         | ✓     |                       | ✓                   |                             | ✓                       |
| A24                          | ✓                                       |       | ✓                     | ✓                   |                             | ✓                       |
| A25                          | ✓                                       |       | ✓                     | ✓                   | ✓                           | ✓                       |
| A26                          | ✓                                       | ✓     | ✓                     | ✓                   | ✓                           | ✓                       |
| A27                          | ✓                                       |       |                       | ✓                   |                             | ✓                       |
| A28                          | ✓                                       | ✓     |                       | ✓                   | ✓                           | ✓                       |
| A29                          | ✓                                       | ✓     |                       | ✓                   | ✓                           | ✓                       |
| A30                          | ✓                                       |       |                       | ✓                   | ✓                           | ✓                       |
| A31                          | ✓                                       |       |                       | ✓                   | ✓                           | ✓                       |
| A32                          |                                         |       |                       | ✓                   | ✓                           | ✓                       |
| A33                          | ✓                                       | ✓     |                       | ✓                   | ✓                           | ✓                       |
| A34                          | ✓                                       | ✓     | ✓                     | ✓                   |                             | ✓                       |
| A35                          | ✓                                       | ✓     |                       | ✓                   | ✓                           | ✓                       |
| A36                          | ✓                                       |       |                       | ✓                   | ✓                           | ✓                       |
| A37                          | ✓                                       |       | ✓                     | ✓                   | ✓                           | ✓                       |
| A38                          | ✓                                       | ✓     |                       | ✓                   | ✓                           | ✓                       |
| A39                          | ✓                                       |       |                       | ✓                   | ✓                           |                         |
| A40                          | ✓                                       |       |                       | ✓                   |                             | ✓                       |
| A41                          | ✓                                       |       |                       | ✓                   | ✓                           | ✓                       |
| A42                          | ✓                                       |       |                       | ✓                   | ✓                           | ✓                       |
| A43                          | ✓                                       |       |                       | ✓                   |                             | ✓                       |
| A44                          | ✓                                       | ✓     | ✓                     | ✓                   | ✓                           | ✓                       |
| A45                          | ✓                                       |       | ✓                     | ✓                   | ✓                           | ✓                       |
| A46                          | ✓                                       |       |                       | ✓                   | ✓                           | ✓                       |
| A47                          |                                         |       |                       | ✓                   | ✓                           | ✓                       |
| A48                          | ✓                                       |       | ✓                     | ✓                   | ✓                           | ✓                       |
